# Supplementary material for: Empirical Evidence for Son-Killing X Chromosomes and the Operation of SA-Zygotic Drive
Source: PubMed Central journal article supplement (PMC3157394; doi:10.1371/journal.pone.0023508), 2011-08-17
Supplement: pone.0023508.s001.pdf [file pone.0023508.s001.pdf]

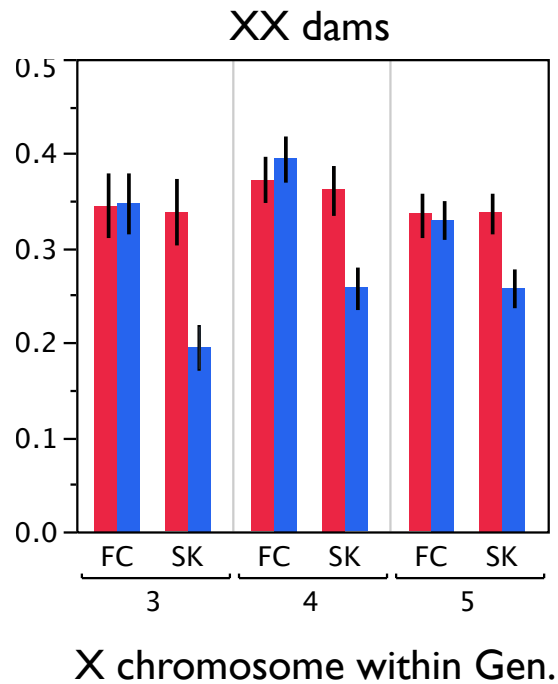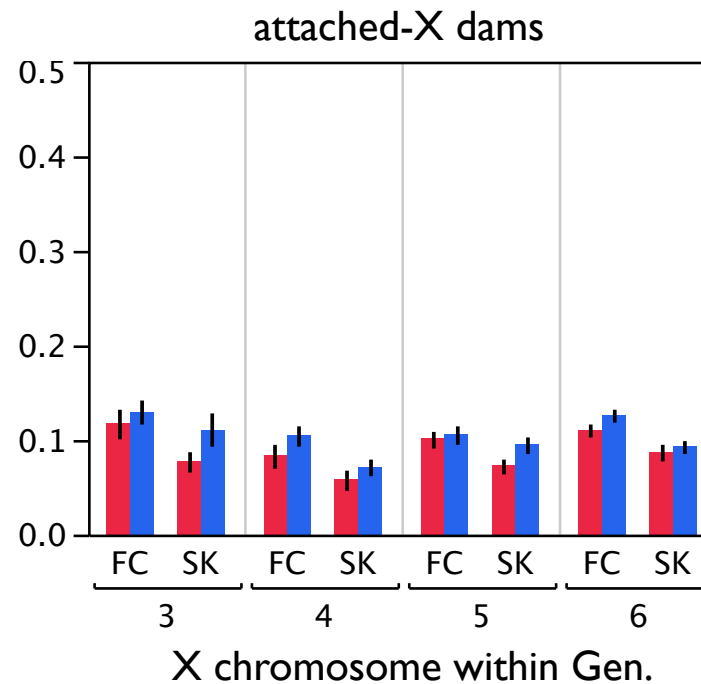

Figure S1. A plot of F/E (red) and M/E (Blue) by backcross generation (3-6) and sire X chromosome (FC or SK) with XX dams and attached-X dams.
